# Supplementary material
Source: Research Square preprint supplement (doi:10.21203/rs.3.rs-9881007/v1)
Supplement: Supplementary file [file 97a7b4a92887cf5b01555235.pdf]

## Supplementary Material

| Subject | SO vs CCI | SO vs EMG | SO vs RMR | CCI vs EMG | CCI vs RMR | EMG vs RMR |
|---------|-----------|-----------|-----------|------------|------------|------------|
| K1L     | < 0.01    | < 0.01    | < 0.01    | < 0.01     | < 0.01     | < 0.01     |
| K2L     | < 0.01    | 0.29      | 0.29      | < 0.01     | < 0.01     | 0.20       |
| K3R     | < 0.01    | < 0.01    | < 0.01    | < 0.01     | 0.73       | < 0.01     |
| K5R     | < 0.01    | < 0.01    | 0.81      | 0.86       | < 0.01     | < 0.01     |
| K7L     | < 0.01    | < 0.01    | 0.04      | < 0.01     | 0.04       | < 0.01     |
| K8L     | < 0.01    | 0.29      | < 0.01    | < 0.01     | 0.50       | < 0.01     |
| Overall | < 0.01    | 0.23      | < 0.01    | < 0.01     | < 0.01     | 0.15       |

**Table S1. Pairwise  $p$ -values comparing KCF estimation errors (RMSE) across four muscle redundancy solvers, by subject and across all subjects combined (Overall).** The evaluated solvers were the Static Optimization (SO), original Residual Muscle Redundancy (RMR), EMG-Informed (EMG), and CCI-Informed (CCI) solver. The  $p$ -values are reported from Wilcoxon signed-rank tests with Holm-Bonferroni correction for multiple comparisons. The  $p$ -values highlighted in green indicate statistically significant differences in RMSE between compared solver pairs ( $p < 0.05$ ).

| Metric                                       | Activity      | Static Optimization | Minimum Activation | EMG-informed    | CCI-informed    |
|----------------------------------------------|---------------|---------------------|--------------------|-----------------|-----------------|
| RMSE [BW]<br>(mean $\pm$ std)                | Level Walking | 0.35 $\pm$ 0.12     | 0.32 $\pm$ 0.15    | 0.34 $\pm$ 0.18 | 0.25 $\pm$ 0.11 |
|                                              | Ramp Descent  | 0.36 $\pm$ 0.16     | 0.33 $\pm$ 0.14    | 0.49 $\pm$ 0.21 | 0.24 $\pm$ 0.07 |
|                                              | Stair Descent | 0.80 $\pm$ 0.23     | 0.54 $\pm$ 0.12    | 0.58 $\pm$ 0.23 | 0.48 $\pm$ 0.10 |
|                                              | Overall       | 0.47 $\pm$ 0.25     | 0.38 $\pm$ 0.17    | 0.44 $\pm$ 0.22 | 0.31 $\pm$ 0.14 |
| $R^2$ [-]<br>(mean $\pm$ std)                | Level Walking | 0.84 $\pm$ 0.10     | 0.88 $\pm$ 0.08    | 0.84 $\pm$ 0.14 | 0.93 $\pm$ 0.05 |
|                                              | Ramp Descent  | 0.89 $\pm$ 0.08     | 0.91 $\pm$ 0.08    | 0.78 $\pm$ 0.15 | 0.95 $\pm$ 0.03 |
|                                              | Stair Descent | 0.45 $\pm$ 0.34     | 0.77 $\pm$ 0.08    | 0.71 $\pm$ 0.19 | 0.81 $\pm$ 0.09 |
|                                              | Overall       | 0.75 $\pm$ 0.26     | 0.86 $\pm$ 0.10    | 0.80 $\pm$ 0.17 | 0.90 $\pm$ 0.08 |
| Peak Force Error<br>[BW]<br>(mean $\pm$ std) | Level Walking | 0.42 $\pm$ 0.42     | 0.40 $\pm$ 0.30    | 0.36 $\pm$ 0.27 | 0.33 $\pm$ 0.27 |
|                                              | Ramp Descent  | 0.63 $\pm$ 0.54     | 0.34 $\pm$ 0.24    | 0.50 $\pm$ 0.32 | 0.28 $\pm$ 0.18 |
|                                              | Stair Descent | 2.06 $\pm$ 0.85     | 0.71 $\pm$ 0.41    | 0.74 $\pm$ 0.52 | 0.64 $\pm$ 0.37 |
|                                              | Overall       | 0.89 $\pm$ 0.91     | 0.47 $\pm$ 0.35    | 0.49 $\pm$ 0.39 | 0.40 $\pm$ 0.32 |

**Table S2. Summary of RMSE in body weight (BW),  $R^2$  and peak force error of the second peak in stance phase for each activity and overall across all activities.** Metrics are compared across four muscle redundancy solvers: Static Optimization, Minimum Activation (RMR), EMG-informed, and CCI-informed. For each activity and the overall results, the best-performing solver is highlighted in green and the worst-performing solver in red. The results show that the CCI-informed simulations performed overall the best in each evaluation metric.

| Activity      | SO vs CCI | SO vs EMG | SO vs RMR | CCI vs EMG | CCI vs RMR | EMG vs RMR |
|---------------|-----------|-----------|-----------|------------|------------|------------|
| Level Walking | < 0.01    | 0.36      | 0.37      | 0.08       | < 0.01     | 0.85       |
| Ramp Descent  | < 0.01    | 0.14      | 0.37      | < 0.01     | < 0.01     | 0.08       |
| Stair Descent | < 0.01    | 0.03      | < 0.01    | 0.10       | < 0.01     | 0.55       |

**Table S3. Pairwise  $p$ -values comparing KCF estimation errors (RMSE) across four muscle redundancy solvers by activity.** The evaluated solvers were the Static Optimization, original Residual Muscle Redundancy (RMR), EMG-Informed (EMG), and CCI-Informed (CCI) solver. The  $p$ -values are reported from Wilcoxon signed-rank tests with Holm-Bonferroni correction for multiple comparisons. The  $p$ -values highlighted in green indicate statistically significant differences in RMSE between compared solver pairs ( $p < 0.05$ ).

| Activity       | Solver              | $\beta$ | Standard Error | 95% CI        | <i>p</i> -value | <i>N</i> (observations) |
|----------------|---------------------|---------|----------------|---------------|-----------------|-------------------------|
| All Activities | Static Optimization | 1.25    | 0.70           | [-0.55, 3.06] | 0.13            | 92                      |
|                | Minimum Acitvation  | 1.55    | 0.30           | [0.79, 2.30]  | 0.00            | 92                      |
|                | EMG-Informed        | 1.34    | 0.76           | [-0.60, 3.28] | 0.14            | 92                      |
|                | CCI-Informed        | 0.78    | 0.25           | [0.14, 1.43]  | 0.03            | 92                      |
| Level Walking  | Static Optimization | 0.16    | 0.69           | [-1.62, 1.94] | 0.83            | 48                      |
|                | Minimum Acitvation  | 1.50    | 0.64           | [-0.14, 3.14] | 0.07            | 48                      |
|                | EMG-Informed        | 0.75    | 1.22           | [-2.39, 3.90] | 0.56            | 48                      |
|                | CCI-Informed        | 0.29    | 0.63           | [-1.34, 1.92] | 0.67            | 48                      |
| Ramp Descent   | Static Optimization | 2.12    | 0.45           | [0.88, 3.36]  | 0.01            | 20                      |
|                | Minimum Acitvation  | 1.53    | 0.35           | [0.56, 2.51]  | 0.01            | 20                      |
|                | EMG-Informed        | -0.61   | 0.62           | [-2.33, 1.12] | 0.38            | 20                      |
|                | CCI-Informed        | 0.34    | 0.30           | [-0.50, 1.17] | 0.32            | 20                      |
| Stair Descent  | Static Optimization | -0.25   | 0.75           | [-2.19, 1.68] | 0.75            | 24                      |
|                | Minimum Acitvation  | 0.96    | 0.36           | [0.03, 1.89]  | 0.04            | 24                      |
|                | EMG-Informed        | 1.30    | 0.88           | [-0.96, 3.55] | 0.20            | 24                      |
|                | CCI-Informed        | 0.43    | 0.37           | [-0.53, 1.39] | 0.30            | 24                      |

**Table S4. Results of linear regression analyses with cluster-robust standard errors examining the association between the CCI and the RMSE of estimated compressive KCF for each solver and activity condition.** The six subjects were treated as clusters. Regression coefficients ( $\beta$ , in BW per unit CCI), cluster-robust standard errors, 95 % confidence intervals (95 % CI), *p*-values, and the number of observations (*N*) are reported for the Static Optimization, Minimum Activation (RMR), EMG-informed, and CCI-informed solvers across all activities combined, as well as separately for level walking, ramp descent, and stair descent.

| Activity       | Solver              | $\beta$         | RE SD | 95% CI        | $R^2_{\text{marg}}$ | ICC  | <i>N</i> (observations) |
|----------------|---------------------|-----------------|-------|---------------|---------------------|------|-------------------------|
| All Activities | Static Optimization | 2.44            | 0.14  | [0.96, 3.66]  | 0.23                | 0.30 | 92                      |
|                | Minimum Acitvation  | 1.94            | 0.11  | [1.55, 2.73]  | 0.37                | 0.52 | 92                      |
|                | EMG-Informed        | 1.47            | 0.18  | [1.03, 2.31]  | 0.14                | 0.69 | 92                      |
|                | CCI-Informed        | NA <sup>†</sup> | NA    | NA            | NA                  | NA   | NA                      |
| Level Walking  | Static Optimization | 1.83            | 0.14  | [0.82, 2.88]  | 0.24                | 0.78 | 48                      |
|                | Minimum Acitvation  | 2.62            | 0.14  | [1.66, 3.24]  | 0.42                | 0.83 | 48                      |
|                | EMG-Informed        | -0.31           | 0.19  | [-0.83, 1.05] | 0.01                | 0.94 | 48                      |
|                | CCI-Informed        | 0.90            | 0.11  | [0.01, 1.64]  | 0.11                | 0.75 | 48                      |
| Ramp Descent   | Static Optimization | NA <sup>†</sup> | NA    | NA            | NA                  | NA   | NA                      |
|                | Minimum Acitvation  | 1.18            | 0.12  | [0.64, 1.77]  | 0.16                | 0.93 | 20                      |
|                | EMG-Informed        | 0.71            | 0.22  | [0.23, 1.69]  | 0.02                | 0.91 | 20                      |
|                | CCI-Informed        | NA <sup>†</sup> | NA    | NA            | NA                  | NA   | NA                      |
| Stair Descent  | Static Optimization | 0.60            | 0.22  | [-1.00, 3.67] | 0.02                | 0.80 | 24                      |
|                | Minimum Acitvation  | NA <sup>†</sup> | NA    | NA            | NA                  | NA   | NA                      |
|                | EMG-Informed        | 0.77            | 0.21  | [-0.20, 2.12] | 0.04                | 0.80 | 24                      |
|                | CCI-Informed        | NA <sup>†</sup> | NA    | NA            | NA                  | NA   | NA                      |

**Table S5. Results of the linear mixed-effects regression analysis between the CCI and the RMSE of estimated compressive KCF for each solver and activity condition.** The fixed-effect slope ( $\beta$ , in BW per unit CCI), its 95 % confidence interval (95 % CI), the between-subject random-effect standard deviation (RE SD), the marginal coefficient of determination ( $R^2_{\text{marg}}$ , variance explained by CCI alone), the intraclass correlation coefficient (ICC, proportion of total variance attributable to between-subject differences), and the number of observations (*N*) are reported for Static Optimization, Minimum Activation (RMR), EMG-informed, and CCI-informed solvers across all activities combined, as well as separately for level walking, ramp descent, and stair descent. The mixed-effects model included subject as a random intercept to account for between-subject variability in baseline RMSE across repeated trials. Models that did not converge are indicated by <sup>†</sup> and were excluded from the analysis.
